# Supplementary material
Source: Research Square preprint supplement (doi:10.21203/rs.3.rs-8799346/v1)
Supplement: Supplementary file 1 [file 43dc9603702e066a1b9bf5fe.docx]

**Additional file 1 - Online questionnaire**

Section 1: Sociodemographic data

1. Are you…?
   1. A man
   2. A woman
   3. Other
   4. I would rather not answer
2. What is your age group?
   1. 24 years or younger
   2. 25 to 34 years
   3. 35 to 44 years
   4. 45 to 54 years
   5. 55 to 64 years
   6. 65 to 74 years
   7. 75 years and older
3. Which language do you most often use to communicate at home?
   1. French
   2. English
   3. Other
4. If you answered “Other”, please specify the language.
5. Where were you born?
   1. In Quebec
   2. Elsewhere in Canada
   3. Outside Canada
6. If you were born outside of Canada, please specify the country.
7. How many years have you lived in Quebec?
   1. Less than 5 years
   2. 5 to 10 years
   3. More than 10 years
   4. Do not know
8. In which administrative region do you live?
   1. Bas Saint-Laurent
   2. Saguenay-Lac-Saint-Jean
   3. Capitale-Nationale (Québec)
   4. Mauricie-et-Centre-du-Québec
   5. Estrie
   6. Montréal
   7. Outaouais
   8. Abitibi-Témiscamingue
   9. Côte-Nord
   10. Nord-du-Québec
   11. Gaspésie-Îles-de-la-Madeleine
   12. Chaudière-Appalaches
   13. Laval
   14. Lanaudière
   15. Laurentides
   16. Montérégie
   17. Nunavik
   18. Terres-Cries-de-la-Baie-James
9. What type of situation best suits the composition of your household?
   1. Person living alone in the household
   2. Couple without children at home
   3. Couple with children at home
   4. Single-parent family (children of any age)
   5. Family with other people
   6. Related persons only (siblings, etc.)
   7. Non-related persons only (roommates)
   8. Other (multiple families, etc.)
10. If you answered "Other," please specify the composition of your household.
11. What is the highest level of education you have completed?
    1. No diploma
    2. Elementary education
    3. Partial high school studies (I-IV)
    4. High School Diploma (Sec V or Grade 12)
    5. Partial studies in a college, technical school or professional training school
    6. Diploma or certificate from a college, technical school or professional training school
    7. Partial studies at university
    8. University degree
    9. Other
12. If you checked "Other," please specify the highest level of education you have completed.
13. In the past 12 months, what was your main occupation?
    1. Full-time worker
    2. Part-time worker
    3. Student
    4. Volunteer/Unpaid Worker
    5. Retired
    6. Homemaker
    7. On maternity/paternity leave
    8. Employment Insurance claimant
    9. Income assistance recipient (income security)
    10. Other
14. If you answered "Other," please specify your main occupation in the last 12 months.
15. How do you feel about your financial situation compared to other people your age?
    1. You consider yourself financially comfortable.
    2. You consider your income sufficient to meet your basic needs or those of your family.
    3. You consider yourself poor.
    4. You consider yourself very poor.
16. Are you currently being treated by a doctor for a chronic health condition other than your neuroendocrine tumor?
    1. Yes
    2. No
17. If you said “Yes,” please specify the chronic health condition.

Section 2: Care trajectory

1. For which disease do you receive care?
   1. Neuroendocrine tumor of the small bowel
   2. Neuroendocrine tumor of the pancreas
2. Is your tumor functional or non-functional?
   1. Functional (secreting)
   2. Non functional (non secreting)
   3. Do not know
3. When did you receive your diagnosis?
   1. Less than a month ago
   2. 1 to 6 months ago
   3. 7 to 12 months ago
   4. 1 to 3 years ago
   5. 3 to 5 years ago
   6. More than five years ago
   7. Do not know
4. If you received your diagnosis more than 5 years ago, please specify how long it has been.
5. Are you currently being treated for your initial disease or for a recurrence?
   1. Initial disease
   2. Recurrence
6. Is your disease metastatic?
   1. Yes
   2. No
7. At the time of answering this questionnaire, what step best describes where you are in your care trajectory to treat this cancer?
   1. Surveillance only (no treatment received since diagnosis)
   2. Ongoing treatment
   3. Treatment completed (follow-up for surveillance only)
   4. Palliative care
